# Supplementary material
Source: PubMed Central journal article supplement (PMC3466553)
Supplement: cc-11-3421-s01.pdf [file cc-11-3421-s01.pdf]

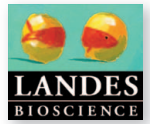

## **Supplemental Material to:**

**Jennifer McQueen, Dewald van Dyk, Barry Young, Chris  
Loewen and Vivien Measday**

**The Mck1 GSK-3 kinase inhibits the activity of Clb2-Cdk1  
post-nuclear division**

**2012; 11(18)**

**<http://dx.doi.org/10.4161/cc.21731>**

**<http://www.landesbioscience.com/journals/cc/article/21731>**

Figure S1

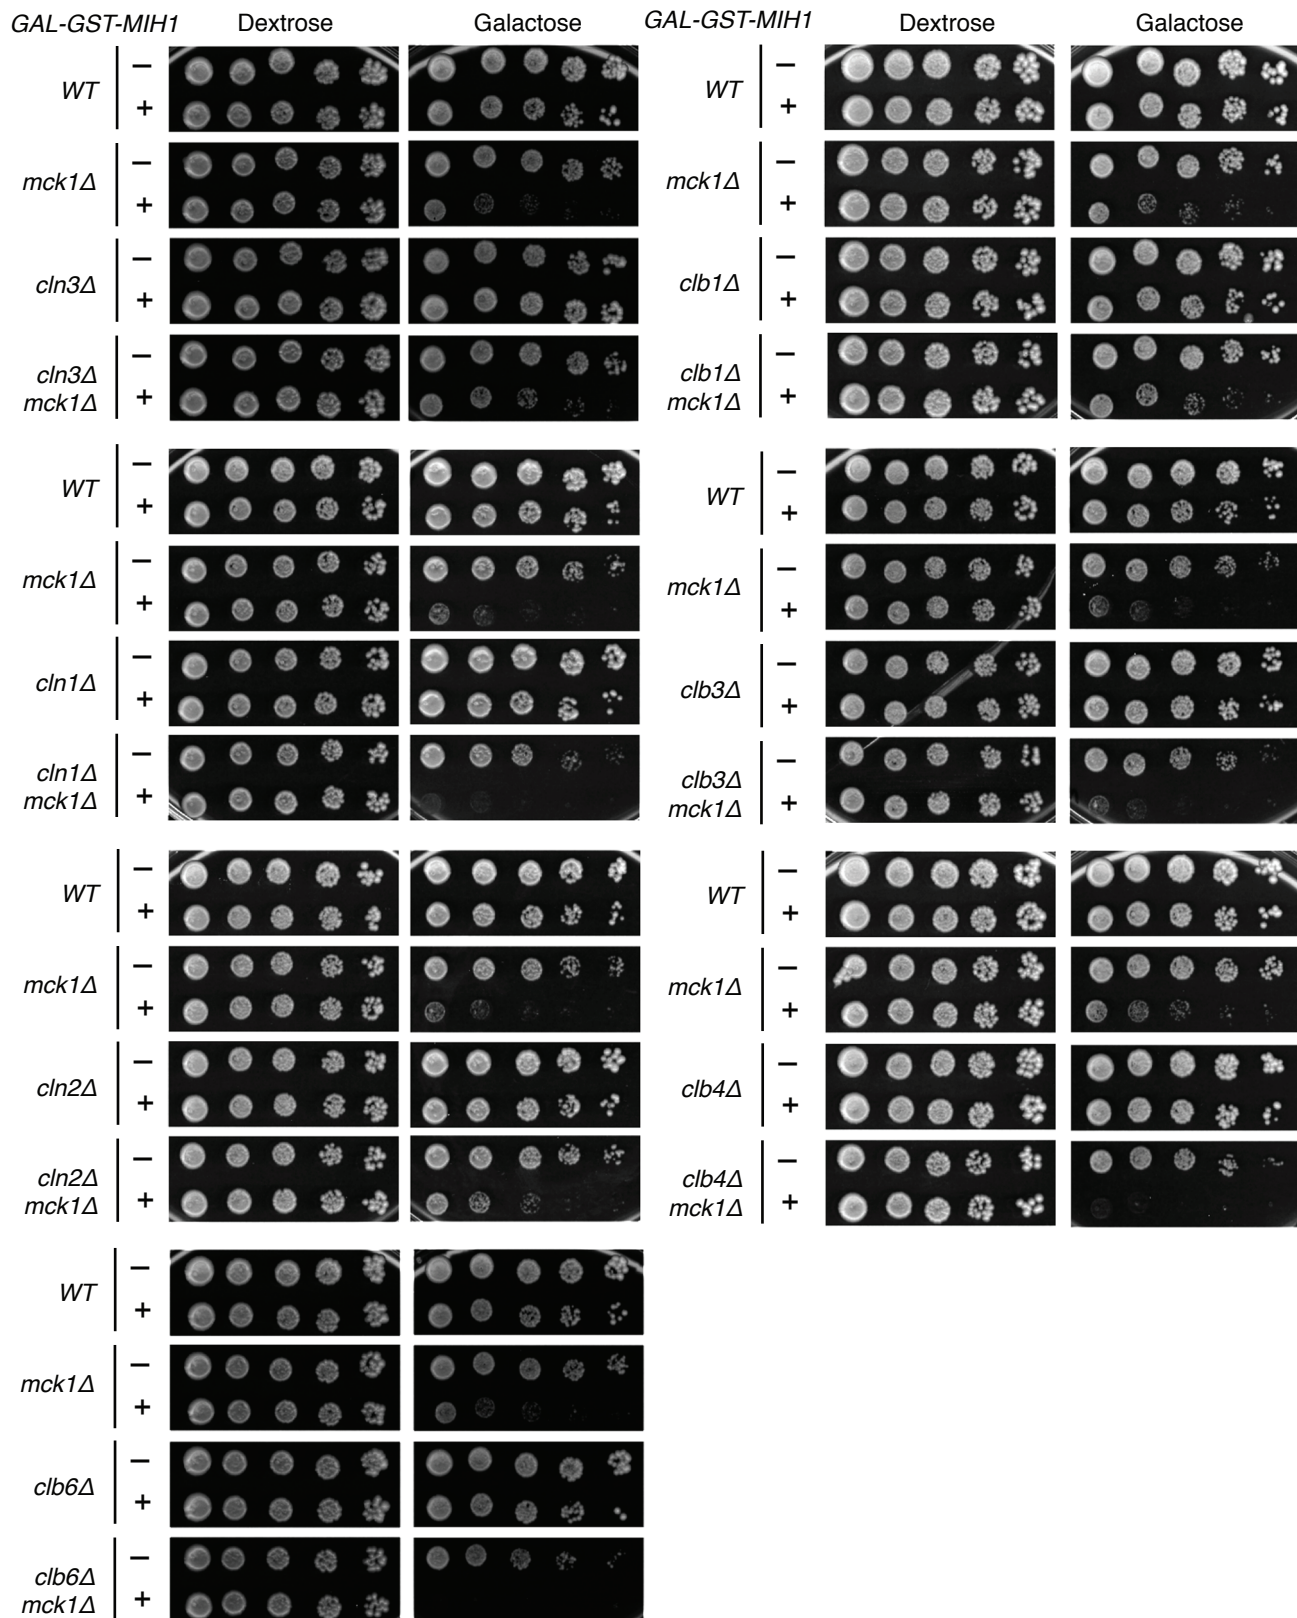

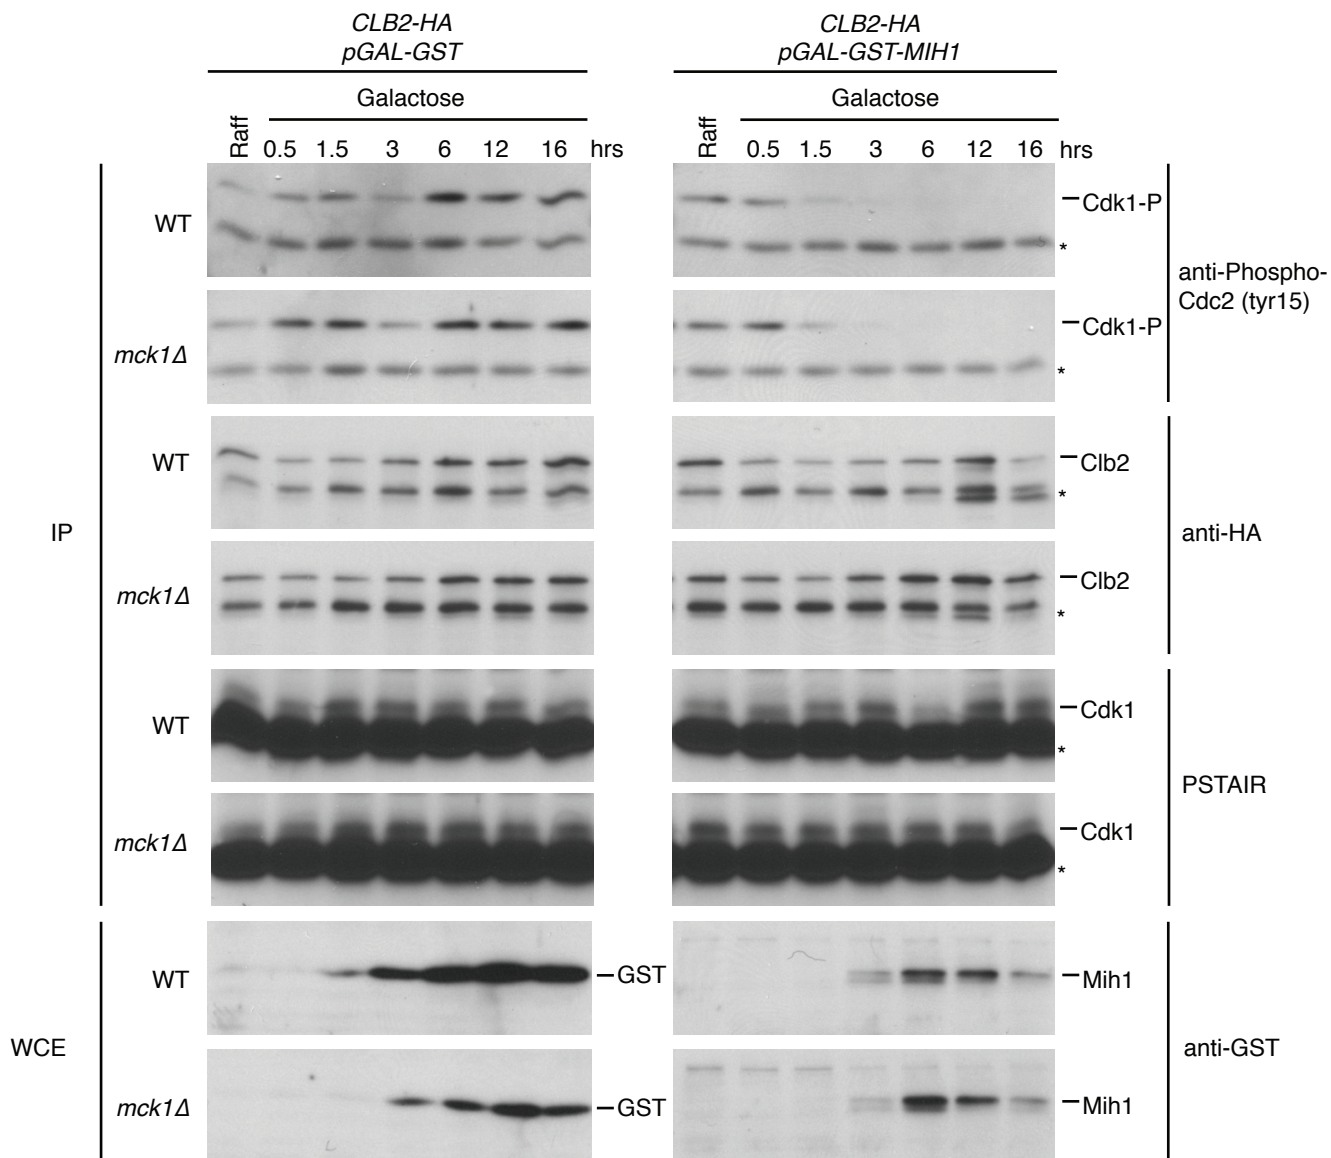

A

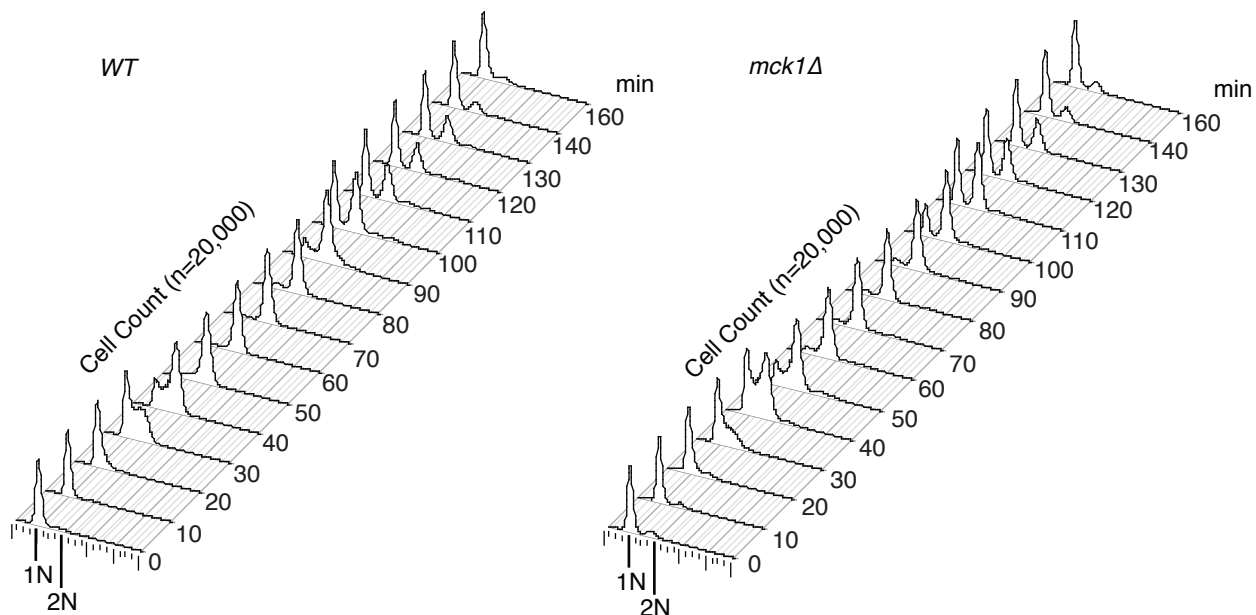

B

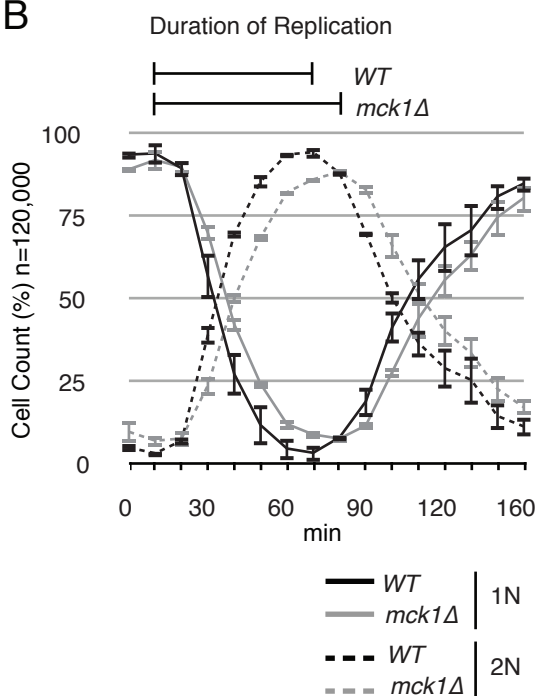

C

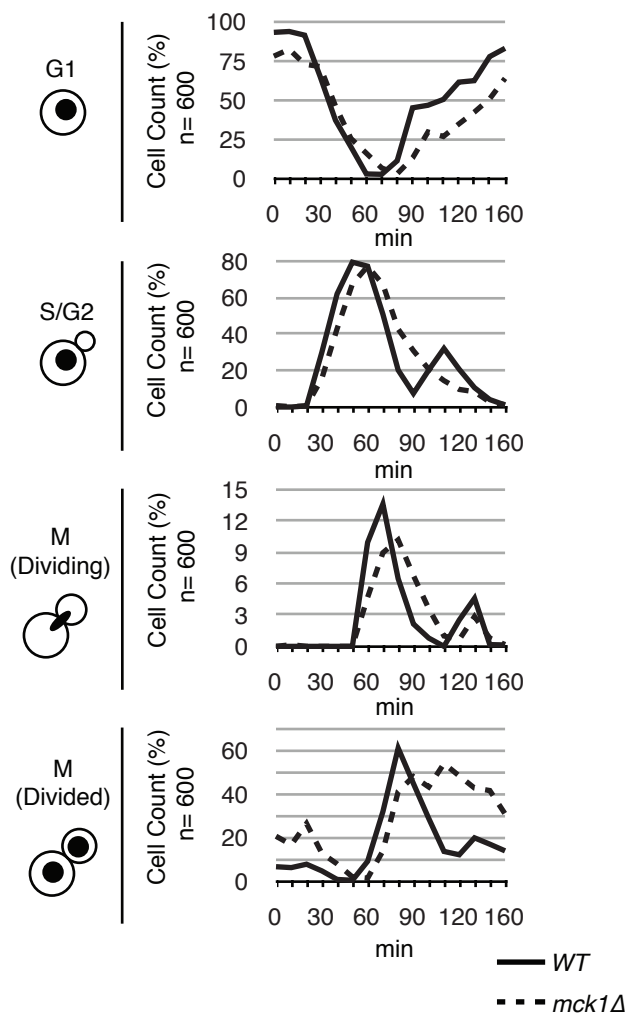

Figure S4

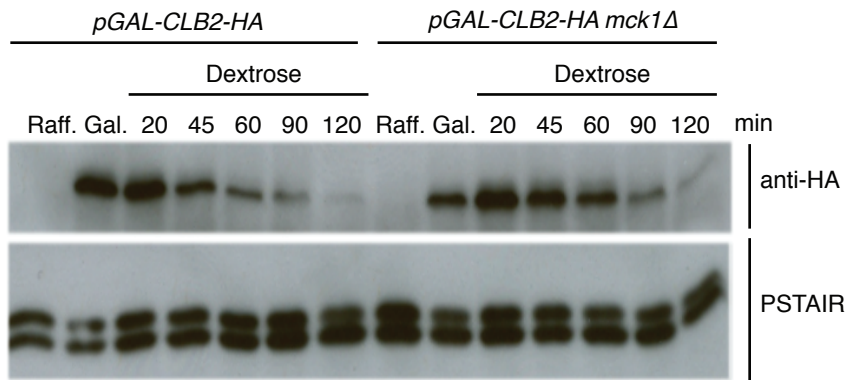

Figure S5

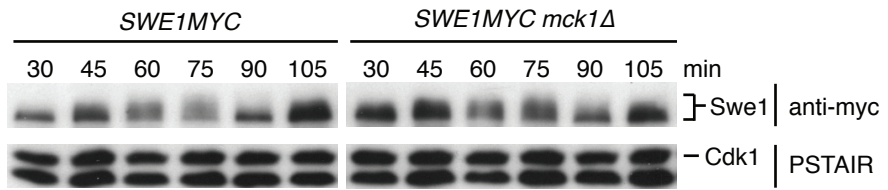

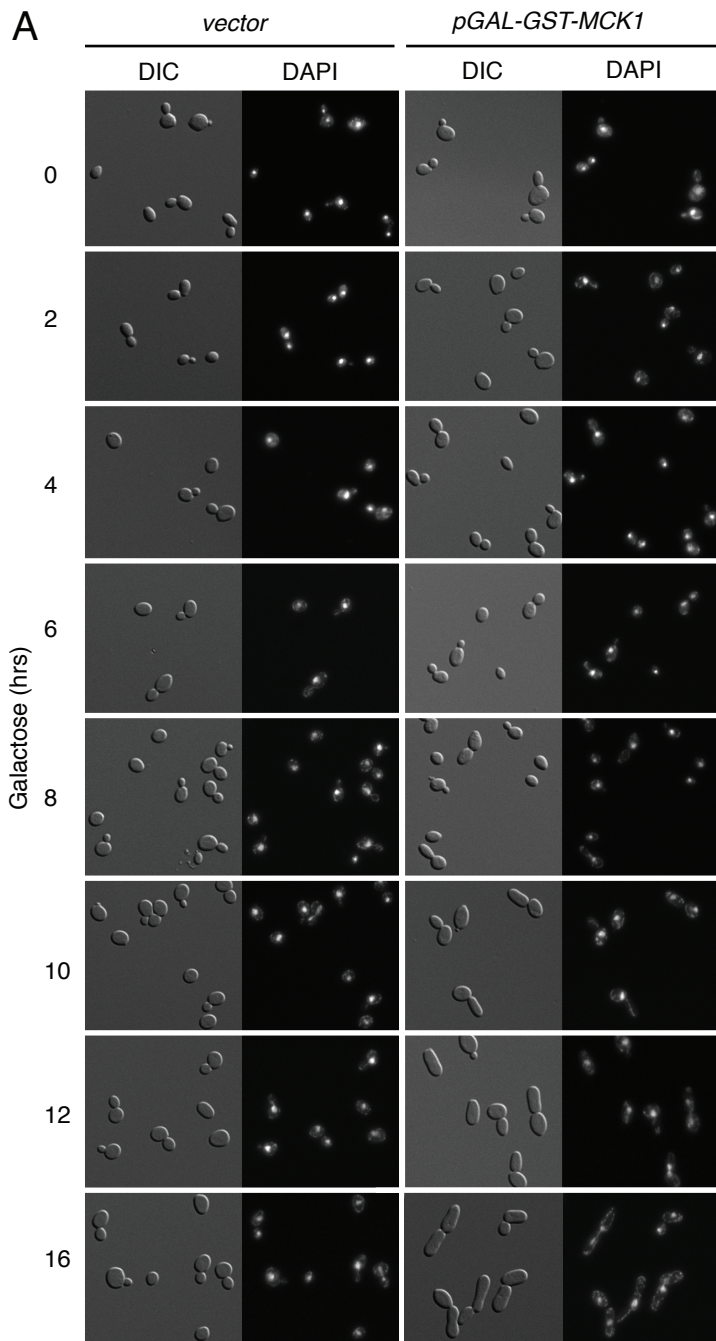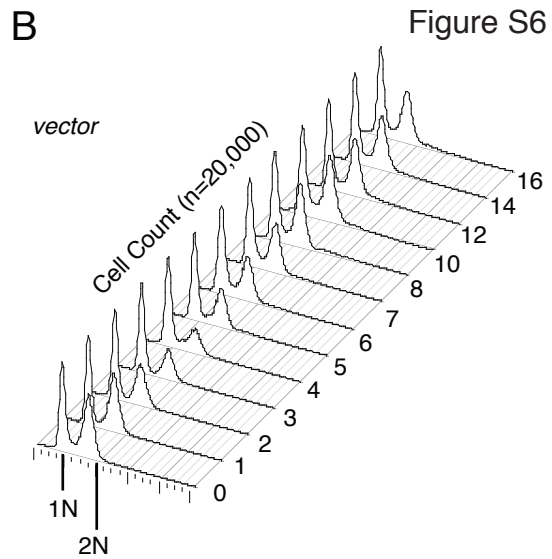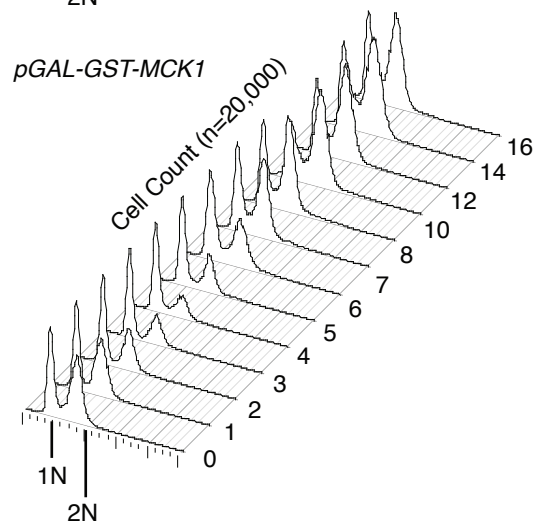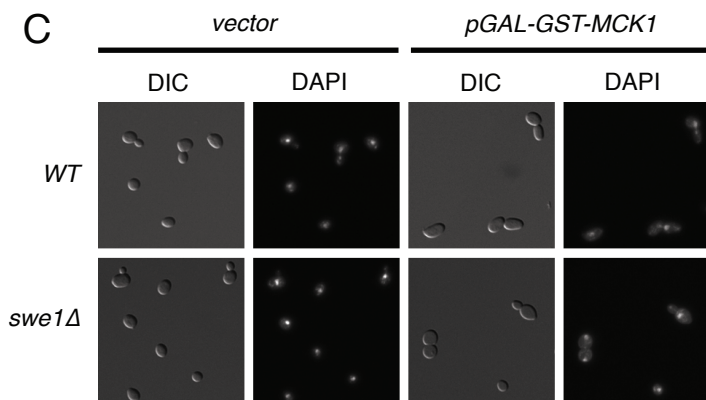

## Supplementary Figure Legends

**Figure S1.** Deletion of cyclins other than *CLB2* cannot rescue the toxicity of overexpressing *MIH1* in the *mck1Δ* strain. *pGAL-GST-MIH1* (+) or vector alone (-) were over expressed in wild type (WT), *mck1Δ*, *cyclinΔ* or *cyclinΔ mck1Δ* double mutants and plated onto dextrose and galactose media. Strains were grown to logarithmic phase, serially diluted onto the indicated media and grown for 4 days at 30°C.

**Figure S2.** Mih1 is active in the absence of Mck1. The following strains were grown in SC<sup>-URA</sup> raffinose (Raff) overnight and re-suspended in galactose media for the indicated times; *CLB2-HA pGAL-GST*, *CLB2-HA pGAL-GST mck1Δ*, *CLB2-HA pGAL-GST-MIH1*, *CLB2-HA pGAL-GST-MIH1 mck1Δ*. Clb2-HA was IP'd and analyzed by western blot with anti-phospho-Cdc2 (tyr15), anti-HA and anti-PSTAIR (Cdk1) antibodies. WCEs were analyzed with anti-GST antibodies. The asterisk (\*) indicates background bands.

**Figure S3.** *mck1Δ* strains are delayed in DNA replication and cell cycle completion. WT and *mck1Δ* strains were synchronized in G1 with mating pheromone. After release from G1 arrest, cell cycle time points were taken every 10 minutes from two independent cultures in replicates of three and processed for FACS and microscopy. (A) A representative DNA content profile analyzed by FACS from one replicate of wild type (WT) and *mck1Δ* strains. (B) FACS data gated for 1N and 2N populations. Population numbers were averaged from the 6 samples taken (replicates of three from two



independent cultures) for each time point. Average population size as a percentage of total cells counted is shown. Error bars represent the standard deviation. Bars above the graph indicate the time required for replication. (C) Microscopy cell cycle analysis of budding index and nuclear division by DAPI staining was performed on duplicate samples from the same culture in both strains.

**Figure S4.** Clb2 degradation is unaltered in the absence of *MCK1*. Wild type and *mck1Δ* strains carrying *CLB2-HA* on a plasmid under the control of the *GAL1* promoter (*pGAL-CLB2-HA*) were grown to logarithmic phase in SC<sup>-URA</sup> Raff. Cultures were washed and resuspended in SC<sup>-URA</sup> galactose (Gal) for 30 minutes to induce *CLB2-HA* expression. Cultures were then washed and re-suspended in SC<sup>-URA</sup> 2% dextrose to arrest *CLB2-HA* expression and samples were taken at indicated times (Dextrose). Clb2-HA degradation was followed by probing western blots with anti-HA antibody. Anti-PSTAIR (Cdk1) antibody was used as a loading control.

**Figure S5.** Swe1 phosphorylation and degradation is unaltered in the absence of *MCK1*. *SWE1myc* and *SWE1myc mck1Δ* strains were synchronized with mating factor, released and Swe1-Myc protein levels monitored by western blot analysis every 15mins starting at 30 mins post mating factor release with anti-myc antibodies (Roche). Cdk1 (PSTAIR) is shown as a loading control.

**Figure S6.** Expression of *pGAL-GST-MCK1* causes bud elongation that is partially rescued by the deletion of *SWE1*. *pGAL-GST-MCK1* or vector alone were grown in wild type cells in SC<sup>-URA</sup> Raff until early log phase then re-suspended into galactose media. Samples were taken for FACS and microscopy analysis every hour during galactose exposure until 8 hours and then again at 10, 12, 14 and 16 hours. (A) Representative microscopy images are shown for several time points. (B) FACS analysis representing DNA content profiles. (C) *pGAL-GST-MCK1*, or vector alone, was expressed in the presence or absence of *SWE1* for 16 hours. Representative microscopy images are presented.

## Supplementary Tables

**Table S1.** Yeast strains used in study

| Strain  | Genotype                                                                                                                                                                                                                                              | Source      |
|---------|-------------------------------------------------------------------------------------------------------------------------------------------------------------------------------------------------------------------------------------------------------|-------------|
| YJM561  | BY4742/S288C, MAT $\alpha$ <i>ura3<math>\Delta</math>::NAT<sup>R</sup> can1<math>\Delta</math>::STE2pr-Sp_HIS5 lyp1<math>\Delta</math> his3<math>\Delta</math>1 leu2<math>\Delta</math>0 ura3<math>\Delta</math>0 met15<math>\Delta</math>0 LYS2+</i> | 1           |
| YJM562  | BY4742/S288C, MAT $\alpha$ <i>YNL307C<math>\Delta</math>NatR can1<math>\Delta</math>::STE2pr-Sp_his5 lyp1<math>\Delta</math> his3<math>\Delta</math>1 leu2<math>\Delta</math>0 ura3<math>\Delta</math>0 met15<math>\Delta</math>0 LYS2+</i>           | 1           |
| YM1761  | YPH499/S288C, MAT $\alpha$ <i>his3<math>\Delta</math>200 ade2-101 ura3-52 lys2-801 leu2<math>\Delta</math>1 trp1-<math>\Delta</math>63</i>                                                                                                            | Phil Hieter |
| YJM336  | YPH499/S288C, MAT $\alpha$ <i>his3<math>\Delta</math>200 ade2-101 ura3-52 lys2-801 leu2<math>\Delta</math>1 trp1-<math>\Delta</math>63, mck1<math>\Delta</math>::KanMX6</i>                                                                           | This study  |
| YJM881  | BY4741/S288C, MAT $\alpha$ <i>his3<math>\Delta</math>1 leu2<math>\Delta</math>0 met15<math>\Delta</math>0 ura3<math>\Delta</math>0 ura3<math>\Delta</math>::NAT<sup>R</sup> cln3<math>\Delta</math>kanMX</i>                                          | This study  |
| YJM879  | BY4741/S288C, MAT $\alpha$ <i>his3<math>\Delta</math>1 leu2<math>\Delta</math>0 met15<math>\Delta</math>0 ura3<math>\Delta</math>0 cln3<math>\Delta</math>kanMX mck1<math>\Delta</math>NAT<sup>R</sup></i>                                            | This study  |
| YJM945  | BY4741/S288C, MAT $\alpha$ <i>his3<math>\Delta</math>1 leu2<math>\Delta</math>0 met15<math>\Delta</math>0 ura3<math>\Delta</math>0 ura3<math>\Delta</math>::NAT<sup>R</sup> cln1<math>\Delta</math>kanMX</i>                                          | This study  |
| YJM947  | BY4741/S288C, MAT $\alpha$ <i>his3<math>\Delta</math>1 leu2<math>\Delta</math>0 met15<math>\Delta</math>0 ura3<math>\Delta</math>0 cln1<math>\Delta</math>kanMX mck1<math>\Delta</math>NAT<sup>R</sup></i>                                            | This study  |
| YJM949  | BY4741/S288C, MAT $\alpha$ <i>his3<math>\Delta</math>1 leu2<math>\Delta</math>0 met15<math>\Delta</math>0 ura3<math>\Delta</math>0 ura3<math>\Delta</math>::NAT<sup>R</sup> cln2<math>\Delta</math>kanMX</i>                                          | This study  |
| YJM951  | BY4741/S288C, MAT $\alpha$ <i>his3<math>\Delta</math>1 leu2<math>\Delta</math>0 met15<math>\Delta</math>0 ura3<math>\Delta</math>0 cln2<math>\Delta</math>kanMX mck1<math>\Delta</math>NAT<sup>R</sup></i>                                            | This study  |
| YJM875  | BY4741/S288C, MAT $\alpha$ <i>his3<math>\Delta</math>1 leu2<math>\Delta</math>0 met15<math>\Delta</math>0 ura3<math>\Delta</math>0 ura3<math>\Delta</math>::NAT<sup>R</sup> clb6<math>\Delta</math>kanMX</i>                                          | This study  |
| YJM877  | BY4741/S288C, MAT $\alpha$ <i>his3<math>\Delta</math>1 leu2<math>\Delta</math>0 met15<math>\Delta</math>0 ura3<math>\Delta</math>0 clb6<math>\Delta</math>kanMX mck1<math>\Delta</math>NAT<sup>R</sup></i>                                            | This study  |
| YJM1087 | BY4741/S288C, MAT $\alpha$ <i>his3<math>\Delta</math>1 leu2<math>\Delta</math>0 met15<math>\Delta</math>0 ura3<math>\Delta</math>0 ura3<math>\Delta</math>::NAT<sup>R</sup> clb1<math>\Delta</math>kanMX</i>                                          | This study  |
| YJM1089 | BY4741/S288C, MAT $\alpha$ <i>his3<math>\Delta</math>1 leu2<math>\Delta</math>0 met15<math>\Delta</math>0 ura3<math>\Delta</math>0 clb1<math>\Delta</math>kanMX mck1<math>\Delta</math>NAT<sup>R</sup></i>                                            | This study  |
| YJM892  | BY4741/S288C, MAT $\alpha$ <i>his3<math>\Delta</math>1 leu2<math>\Delta</math>0 met15<math>\Delta</math>0 ura3<math>\Delta</math>0 ura3<math>\Delta</math>::NAT<sup>R</sup> clb2<math>\Delta</math>kanMX</i>                                          | This study  |
| YJM887  | BY4741/S288C, MAT $\alpha$ <i>his3<math>\Delta</math>1 leu2<math>\Delta</math>0 met15<math>\Delta</math>0 ura3<math>\Delta</math>0 clb2<math>\Delta</math>kanMX mck1<math>\Delta</math>NAT<sup>R</sup></i>                                            | This study  |
| YJM953  | BY4741/S288C, MAT $\alpha$ <i>his3<math>\Delta</math>1 leu2<math>\Delta</math>0 met15<math>\Delta</math>0 ura3<math>\Delta</math>0 ura3<math>\Delta</math>::NAT<sup>R</sup> clb3<math>\Delta</math>kanMX</i>                                          | This study  |
| YJM956  | BY4741/S288C, MAT $\alpha$ <i>his3<math>\Delta</math>1 leu2<math>\Delta</math>0 met15<math>\Delta</math>0 ura3<math>\Delta</math>0 clb3<math>\Delta</math>kanMX mck1<math>\Delta</math>NAT<sup>R</sup></i>                                            | This study  |
| YJM1080 | BY4741/S288C, MAT $\alpha$ <i>his3<math>\Delta</math>1 leu2<math>\Delta</math>0 met15<math>\Delta</math>0 ura3<math>\Delta</math>0 ura3<math>\Delta</math>::NAT<sup>R</sup> clb4<math>\Delta</math>kanMX</i>                                          | This study  |
| YJM1082 | BY4741/S288C, MAT $\alpha$ <i>his3<math>\Delta</math>1 leu2<math>\Delta</math>0 met15<math>\Delta</math>0 ura3<math>\Delta</math>0 clb4<math>\Delta</math>kanMX mck1<math>\Delta</math>NAT<sup>R</sup></i>                                            | This study  |
| YJM97   | S288C, MAT $\alpha$ <i>his3<math>\Delta</math>200 ade2-101 ura3-52 lys2-801 leu2<math>\Delta</math>1 trp1-<math>\Delta</math>63, swe1-13myc::<i>HIS3</i></i>                                                                                          | This study  |
| YJM99   | S288C, MAT $\alpha$ <i>his3<math>\Delta</math>200 ade2-101 ura3-52 lys2-801 leu2<math>\Delta</math>1 trp1-<math>\Delta</math>63, swe1-13myc::<i>HIS3</i>, mck1<math>\Delta</math>kanMX6</i>                                                           | This study  |
| YJM871  | W303, MAT $\alpha$ <i>ura3<math>\Delta</math>, trp1-1, ade2-1, his3-11, 15 Leu2-3, 112 can1-100 GAL+, Clb2-HA</i>                                                                                                                                     | Mike Tyers  |

| Strain         | Genotype                                                                                                      | Source       |
|----------------|---------------------------------------------------------------------------------------------------------------|--------------|
| YJM1029        | W303 MATa <i>ura3Δ, trp1-1, ade2-1, his3-11, 15 leu2-3, 112 can1-100, mck1ΔkanMX6 clb2-HA</i>                 | This study   |
| YLM91          | YPH499/S288C, MATa <i>his3Δ200 ade2-101 ura3-52 lys2-801 leu2Δ1 trp1-Δ63, MCK1-13myc::TRP1</i>                | This study   |
| YJM889         | YPH499/S288C, MATa <i>his3Δ200 ade2-101 ura3-52 lys2-801 leu2Δ1 trp1-Δ63, MCK1-13myc::TRP1, mih1Δ::TRP1</i>   | This study   |
| YJM1143        | YPH499/BY4742 S288C MATα <i>ade2-101 lys2-801 MCK1-13myc::TRP1 clb2ΔkanMX</i>                                 | This study   |
| YM2169 (DK186) | W303, MATa <i>leu2-3, 112 trp1-1 can1-100 ura3-1 ade2-1 his3-11,15 GAL+ bar1</i>                              | Doug Kellogg |
| YJM1157        | W303, MATa <i>leu2-3, 112 trp1-1 can1-100 ura3-1 ade2-1 his3-11,15 GAL+ bar1 MCK1-13myc:KanMX6</i>            | This study   |
| YJM1243A       | W303, MATa <i>leu2-3, 112 trp1-1 can1-100 ura3-1 ade2-1 his3-11,15 GAL+ bar1 mck1D164A-13-myc:TRP</i>         | This study   |
| YJM1211A       | W303, MATa <i>leu2-3, 112 trp1-1 can1-100 ura3-1 ade2-1 his3-11,15 GAL+ bar1 CLB2-HA:HIS cdc28::cdc28-as1</i> | This study   |

**Table S2.** Plasmids used in this study.

| Plasmid Name       | Plasmid              | Description                                                  | Reference or Source |
|--------------------|----------------------|--------------------------------------------------------------|---------------------|
| BVM392             | <i>pGAL-CLB2-HA</i>  | <i>pWS945, CEN4, GAL10-CLB2-3xHA, LEU2, URA3</i>             | <sup>2</sup>        |
| BVM389             | <i>Empty vector</i>  | <i>pRS316, CEN6, URA3</i>                                    | <sup>3</sup>        |
| BVM311             | <i>pGAL-GST-MIH1</i> | <i>pEGH, 2<math>\mu</math>, GAL1/10-GST-6xHIS-MIH1, URA3</i> | Open biosystems     |
| Not yet designated | <i>pGAL-GST-MCK1</i> | <i>pEGH, 2<math>\mu</math>, GAL1/10-GST-6xHIS-MCK1, URA3</i> | Open biosystems     |
| BVM288             | <i>Empty vector</i>  | <i>pEGH, 2<math>\mu</math></i>                               | Open biosystems     |

## References

1. Tong AH, Evangelista M, Parsons AB, Xu H, Bader GD, Page N, et al. Systematic genetic analysis with ordered arrays of yeast deletion mutants. *Science* 2001; 294:2364-8.
2. Seufert W, Futcher B, Jentsch S. Role of a ubiquitin-conjugating enzyme in degradation of S- and M-phase cyclins. *Nature* 1995; 373:78-81.
3. Sikorski RS, Hieter P. A system of shuttle vectors and yeast host strains designed for efficient manipulation of DNA in *Saccharomyces cerevisiae*. *Genetics* 1989; 122:19-27.
